# Supplementary material
Source: publisher figshare collection journal article supplement (https://sage.figshare.com/ndownloader/files/22661198)
Supplement: Supplementary file 1 [file 22661198]

**Sex-Dependent Regeneration Patterns in Mouse Submandibular Glands**

Callie T. Brown<sup>1</sup>, Kihoon Nam<sup>1</sup>, Yue Zhang<sup>2</sup>, Yuqing Qiu<sup>2</sup>, Spencer Dean<sup>1</sup>, Harim T.

DosSantos<sup>1</sup>, Pedro Lei<sup>3</sup>, Stelios T. Andreadis<sup>3,4,5</sup>, Olga J. Baker<sup>1\*</sup>

<sup>1</sup>School of Dentistry, <sup>2</sup>Department of Internal Medicine, Division of Epidemiology, The University of Utah, Salt Lake City, Utah, USA, <sup>3</sup>Department of Chemical and Biological Engineering, <sup>4</sup>Department of Biomedical Engineering, School of Engineering and Applied Sciences, <sup>5</sup>Center of Bioinformatics and Life Sciences, University at Buffalo, The State University of New York, Buffalo, New York, USA

\*Correspondence to:

Olga J. Baker, DDS, PhD

The University of Utah

School of Dentistry

383 Colorow Drive

Room 289A

Salt Lake City UT 84108-1201, USA.

E-mail: olga.baker@hsc.utah.eduAppendix

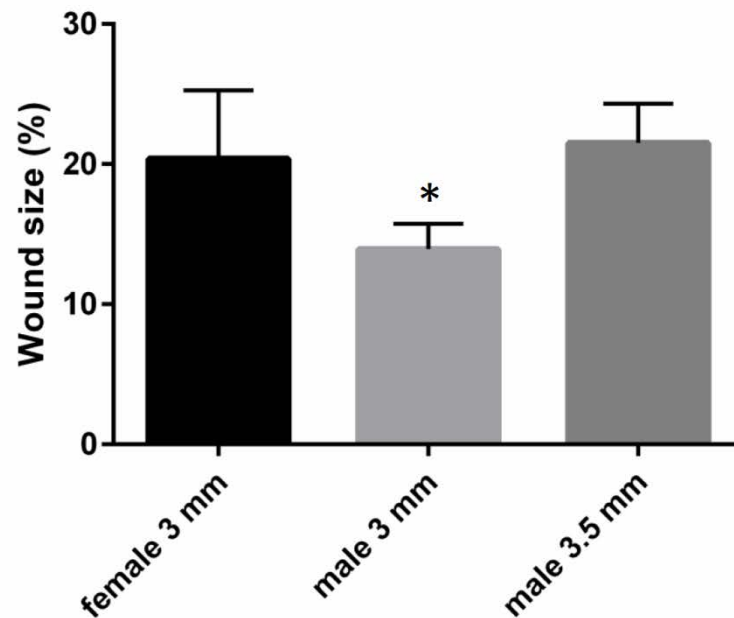

**Appendix Figure 1. Males Require a 3.5-mm Surgical Punch to Have the Same Percentage of Gland Loss as Females** SMG from male and female mice were dissected. Weights of glands were recorded, and surgical wounds were created using a 3-mm or 3.5-mm diameter biopsy punch. Then, glands were weighed again, and the percentage change was calculated. Data represent the means  $\pm$  SD of  $n = 7$  SMG per condition and statistical significance was assessed by one-way ANOVA ( $P < 0.05$ ) and Dunnett's post-hoc test for multiple comparisons to the female glands (3-mm wound).

## Appendix

| <b>Saliva Secretion Group Comparison - Male</b> |                        |               |                 |
|-------------------------------------------------|------------------------|---------------|-----------------|
| <b>Group</b>                                    | <b>Mean Difference</b> | <b>95% CI</b> | <b>p.Adjust</b> |
| <b>L<sub>1p</sub>-FH vs. Untreated</b>          | 0.15                   | (-0.02, 0.32) | 0.09            |
| <b>Sham vs. Untreated</b>                       | 0.32                   | (0.16, 0.49)  | <0.001          |
| <b>Sham vs. L<sub>1p</sub>-FH</b>               | 0.18                   | (0.01, 0.34)  | 0.041           |

| <b>Saliva Secretion Group Comparison - Female</b> |                        |               |                 |
|---------------------------------------------------|------------------------|---------------|-----------------|
| <b>Group</b>                                      | <b>Mean Difference</b> | <b>95% CI</b> | <b>p.Adjust</b> |
| <b>L<sub>1p</sub>-FH vs. Untreated</b>            | 0.36                   | (0.13, 0.59)  | 0.01            |
| <b>Sham vs. Untreated</b>                         | 0.65                   | (0.42, 0.88)  | <0.001          |
| <b>Sham vs. L<sub>1p</sub>-FH</b>                 | 0.29                   | (0.07, 0.52)  | 0.009           |

**Appendix Figure 2. L<sub>1p</sub>-FH Promote Saliva Secretion in Females Only** Mice were anesthetized and stimulated with pilocarpine (50 mg/kg) and isoproterenol (0.5 mg/kg) in untreated, L<sub>1p</sub>-FH, and sham groups at post-surgery day 20 in male and female mice. Then, whole saliva was collected for 5 min. Data represent the means  $\pm$  SD of n = 10 mice per condition and statistical significance was assessed by one-way ANOVA and Tukey's Honestly Significant Differences post-hoc test.

## Appendix

| <b>Antibody</b>                            | <b>Dilution</b> |
|--------------------------------------------|-----------------|
| Rabbit anti-ICAM1                          | 1:100           |
| Mouse anti-VCAM-1                          | 1:100           |
| Rabbit anti-iNOS                           | 1:100           |
| Rabbit anti-Arginase 1                     | 1:100           |
| Alexa Fluor 488 conjugated anti-rabbit IgG | 1:500           |
| Alexa Fluor 568 conjugated anti-rabbit IgG | 1:500           |
| Alexa Fluor 568 conjugated anti-mouse IgG  | 1:500           |
| TO-PRO-3                                   | 1:1000          |

**Appendix Table 1.** List of antibodies used for immunofluorescent staining.
